# Supplementary material for: Structural decomposition analysis with disaggregate factors within the Leontief inverse
Source: Springer Nature journal article supplement (doi:10.1186/s40008-021-00245-5), 2021-08-30
Supplement: MOESM1 [file 19613768]

# Measures of distance used for the comparison of estimated and true vectors of changes

(online appendix to “Structural decomposition analysis with disaggregate factors within the Leontief inverse”)

| Measure                                                            | Abbreviation | Formula                                                                                                                                                                                                                                  | Reference                        |
|--------------------------------------------------------------------|--------------|------------------------------------------------------------------------------------------------------------------------------------------------------------------------------------------------------------------------------------------|----------------------------------|
| Mean absolute difference                                           | MAD          | $\frac{1}{I \times J} \sum_{j=1}^J \sum_{i=1}^I  x_{ij}^{est} - x_{ij}^{true} $                                                                                                                                                          | Lahr (2001)                      |
| Mean absolute percentage error                                     | MAPE         | $\frac{1}{I \times J} \sum_{j=1}^J \sum_{i=1}^I \frac{ x_{ij}^{est} - x_{ij}^{true} }{ x_{ij}^{true} } \times 100$                                                                                                                       | Temurshoev et al. (2011)         |
| Mean absolute scaled error                                         | MASE         | $\sum_{j=1}^J \sum_{i=1}^I \frac{ x_{ij}^{est} - x_{ij}^{true} }{\frac{1}{I \times J} \sum_{j=1}^J \sum_{i=1}^I  x_{ij}^{true} - \overline{x^{true}} }$                                                                                  | Valderas-Jaramillo et al. (2019) |
| Mean squared deviation                                             | MSD          | $\frac{1}{I \times J} \sum_{j=1}^J \sum_{i=1}^I (x_{ij}^{est} - x_{ij}^{true})^2$                                                                                                                                                        | Steen-Olsen et al. (2016)        |
| Root mean squared error                                            | RMSE         | $\frac{1}{I \times J} \left( \sum_{j=1}^J \sum_{i=1}^I (x_{ij}^{est} - x_{ij}^{true})^2 \right)^{\frac{1}{2}}$                                                                                                                           | Lahr (2001)                      |
| Standardized weighted absolute difference                          | SWAD         | $\frac{\sum_{j=1}^J \sum_{i=1}^I  x_{ij}^{true}  \times  x_{ij}^{est} - x_{ij}^{true} }{\sum_{j=1}^J \sum_{i=1}^I (x_{ij}^{true})^2} \times 100$                                                                                         | Lahr (2001)                      |
| Symmetric absolute mean percentage error                           | SWAPE        | $\sum_{j=1}^J \sum_{i=1}^I \left( \frac{ x_{ij}^{true} }{\sum_{j=1}^J \sum_{i=1}^I  x_{ij}^{true} } \right) \left  \frac{x_{ij}^{est} + x_{ij}^{true}}{x_{ij}^{est} - x_{ij}^{true}} \right  \times 100$                                 | Valderas-Jaramillo et al. (2019) |
| Theil's U statistic (square root of Theil's U index of inequality) | Theil        | $\left( \frac{\sum_{j=1}^J \sum_{i=1}^I (x_{ij}^{est} - x_{ij}^{true})^2}{\sum_{j=1}^J \sum_{i=1}^I (x_{ij}^{true})^2} \right)^{\frac{1}{2}} \times 100$                                                                                 | Lahr (2001)                      |
| Weighted absolute difference                                       | WAD          | $\frac{\sum_{j=1}^J \sum_{i=1}^I (x_{ij}^{est} + x_{ij}^{true}) \times  x_{ij}^{est} - x_{ij}^{true} }{\sum_{j=1}^J \sum_{i=1}^I (x_{ij}^{est} + x_{ij}^{true})}$                                                                        | Lahr (2001)                      |
| Weighted average percentage error                                  | WAPE         | $\sum_{j=1}^J \sum_{i=1}^I \left( \frac{ x_{ij}^{true} }{\sum_{j=1}^J \sum_{i=1}^I  x_{ij}^{true} } \right) \frac{ x_{ij}^{est} - x_{ij}^{true} }{ x_{ij}^{true} } \times 100$                                                           | Temurshoev et al. (2011)         |
| Weighted absolute scaled error                                     | WASE         | $\sum_{j=1}^J \sum_{i=1}^I \left( \frac{ x_{ij}^{true} }{\sum_{j=1}^J \sum_{i=1}^I  x_{ij}^{true} } \right) \frac{ x_{ij}^{est} - x_{ij}^{true} }{\frac{1}{I \times J} \sum_{j=1}^J \sum_{i=1}^I  x_{ij}^{true} - \overline{x^{true}} }$ | Valderas-Jaramillo et al. (2019) |
| Weighted average square percentage error                           | WASPE        | $\sum_{j=1}^J \sum_{i=1}^I \left( \frac{(x_{ij}^{true})^2}{\sum_{j=1}^J \sum_{i=1}^I (x_{ij}^{true})^2} \right) \frac{(x_{ij}^{est} - x_{ij}^{true})^2}{(x_{ij}^{true})^2} \times 100$                                                   | Rueda-Cantuche et al. (2018)     |

Note:  $x_{ij}^{est}$  is the  $i, j$ -th element in the estimated matrix and  $x_{ij}^{true}$  is the respective element in the true matrix.  $I$  and  $J$  are the matrix dimensions.

## References

- Lahr, M. L. (2001). A Strategy for Producing Hybrid Regional Input-Output Tables. In M. L. Lahr & E. Dietzenbacher (Eds.), *Input-Output Analysis: Frontiers and Extensions* (pp. 1–31). London: Palgrave.
- Rueda-Cantuche, J. M., Amores, A. F., Beutel, J. & Remond-Tiedrez, I. (2018). Assessment of European Use tables at basic prices and valuation matrices in the absence of official data. *Economic Systems Research*, 30(2), 252–270.
- Steen-Olsen, K., Owen, A., Barrett, J., Guan, D., Hertwich, G. H., Lenzen, M., & Wiedmann, T. (2016). Accounting for value added embodied in trade and consumption: an intercomparison of global multiregional input-output databases. *Economic Systems Research*, 28(1), 78–94.
- Temurshoev, U., Webb, C., & Yamano, N. (2011). Projection of supply and use tables: methods and their empirical assessment. *Economic Systems Research*, 23(1), 91–123.
- Valderas-Jaramillo, J. M., Rueda-Cantuche, J. M., Olmedo, E. & Beutel, J. (2019). Projecting supply and use tables: new variants and fair comparisons. *Economic Systems Research*, 31(3), 423–444.
